# Supplementary material for: Immediate side effects of Comirnaty COVID-19 vaccine: A nationwide survey of vaccinated people in Israel, December 2020 to March 2021
Source: PubMed Central journal article supplement (PMC8973016; doi:10.2807/1560-7917.es.2022.27.13.2100540), 2022-03-31
Supplement: 21-00540_SHAPIRO_Supplement.pdf [file 21-00540_SHAPIRO_Supplement.pdf]

## Supplementary material 1- Survey questionnaire

This supplementary material is hosted by *Eurosurveillance* as supporting information alongside the article 'Immediate side effects of Comirnaty COVID-19 vaccine- A nationwide survey of vaccinated people in Israel, December 2020 to March 2021' on behalf of the authors who remain responsible for the accuracy and appropriateness of the content. The same standards for ethics, copyright, attributions and permissions as for the article apply. Supplements are not edited by *Eurosurveillance* and the journal is not responsible for the maintenance of any links or email addresses provided therein.

### 1. Did you experience one or more of the following symptoms after receiving the vaccine?

Please indicate all relevant symptoms

1. I did not experience any symptoms after receiving the vaccine
2. Fever
3. Fatigue
4. Headaches
5. Vomiting
6. Nausea
7. Muscle ache
8. Joint pain
9. Hoarseness – if yes, please contact your doctor
10. Cough – if yes, please contact your doctor
11. Eye irritation – if yes, please contact your doctor
12. Facial swelling – if yes, please contact your doctor
13. Skin rash – if yes, please contact your doctor
14. Dizziness
15. Significant weariness
16. Chills
17. Abnormal sensation in the face (numbness, tingling)
18. Other:

2. Age: \_\_\_\_\_

3. Sex: \_\_\_\_\_

Supplementary material 2- Comparison of reporting systemic side effects after the first and second vaccine doses between pregnant women and their matched controls\*

|                                              | First Dose                 |      |                     |      |            | Second Dose               |      |                     |      |            |
|----------------------------------------------|----------------------------|------|---------------------|------|------------|---------------------------|------|---------------------|------|------------|
|                                              | Pregnant women<br>N= 1,650 |      | Controls<br>N=6,600 |      | P<br>value | Pregnant women<br>N=1,014 |      | Controls<br>N=4,052 |      | P<br>value |
|                                              | N                          | %    | N                   | %    |            | N                         | %    | N                   | %    |            |
| Any Symptom                                  | 591                        | 35.8 | 3,032               | 45.9 | <.001      | 671                       | 66.2 | 3,207               | 79.1 | <.001      |
| Weakness,<br>Dizziness and<br>Fatigue        | 366                        | 22.2 | 1,877               | 28.4 | <.001      | 542                       | 53.5 | 2,631               | 64.9 | <.001      |
| Myalgia and<br>Arthralgia                    | 117                        | 7.1  | 1,044               | 15.4 | <.001      | 294                       | 29   | 1,914               | 47.2 | <.001      |
| Headaches                                    | 190                        | 11.5 | 1,096               | 16.6 | <.001      | 343                       | 33.8 | 1,867               | 41.6 | <.001      |
| Chills                                       | 40                         | 2.4  | 316                 | 4.8  | <.001      | 213                       | 21   | 1,477               | 36.5 | <.001      |
| Fever                                        | 16                         | 1    | 176                 | 2.7  | <.001      | 146                       | 14.4 | 1,170               | 28.9 | <.001      |
| Vomiting,<br>Nausea and<br>Diarrhea          | 101                        | 6.1  | 548                 | 8.3  | 0.003      | 166                       | 16.4 | 854                 | 21.1 | <.001      |
| Facial<br>paresthesia                        | 5                          | 0.3  | 84                  | 1.3  | 0.001      | 2                         | 0.2  | 79                  | 1.9  | <.001      |
| Eye irritation,<br>Facial swelling ,<br>Rash | 11                         | 0.7  | 58                  | 0.9  | 0.397      | 6                         | 0.6  | 70                  | 1.7  | 0.008      |
| Hoarseness and<br>cough                      | 17                         | 1    | 46                  | 0.7  | 0.164      | 9                         | 0.9  | 78                  | 1.9  | 0.023      |
| Other                                        | 71                         | 4.3  | 356                 | 5.4  | 0.074      | 71                        | 7    | 311                 | 7.7  | 0.468      |

\*Non-pregnant controls are women respondents matched by age and ethnicity and when compared to pregnant women respondents the ratio was 4:1 respectively
